# Supplementary material
Source: PubMed Central journal article supplement (PMC3137886)
Supplement: NIHMS300969-supplement-01.pdf [file NIHMS300969-supplement-01.pdf]

| Probe Set ID               | Fold change | Gene Symbol    | Gene Title                                                   |
|----------------------------|-------------|----------------|--------------------------------------------------------------|
| 1 GgaAffx.7587.1.S1_s_at   | 19.0        | TMC2           | transmembrane channel-like 2                                 |
| 2 Gga.2701.1.S2_at         | 10.6        | FGF3           | fibroblast growth factor 3                                   |
| 3 Gga.2701.1.S1_at         | 10.4        | FGF3           | fibroblast growth factor 3                                   |
| 4 GgaAffx.20451.1.S1_at    | 6.66        |                | Finished cDNA, clone ChEST905o6                              |
| 5 Gga.696.1.S1_at          | 6.15        | BDNF           | brain-derived neurotrophic factor                            |
| 6 GgaAffx.8657.1.S1_at     | 5.63        | ALPHA 10 nAChR | alpha 10 subunit of nicotinic acetylcholine receptor         |
| 7 GgaAffx.20451.1.S1_s_at  | 4.94        |                | Finished cDNA, clone ChEST905o6                              |
| 8 GgaAffx.10611.1.S1_s_at  | 4.86        | OTOF           | otoferlin                                                    |
| 9 Gga.16174.1.S1_at        | 4.79        | TMCC2          | transmembrane and coiled-coil domain family 2                |
| 10 Gga.6162.1.S1_at        | 4.76        | SPTBN5         | spectrin, beta, non-erythrocytic 5                           |
| 11 Gga.1714.1.S1_at        | 4.74        | A2M            | alpha-2-macroglobulin                                        |
| 12 Gga.14009.1.S1_at       | 4.58        | MAPIB          | Finished cDNA, clone ChEST117a22                             |
| 13 Gga.16864.1.S1_at       | 4.55        |                | Finished cDNA, clone ChEST713110                             |
| 14 GgaAffx.10770.2.S1_at   | 4.47        | LOC418738      | similar to Family with sequence similarity 70, member B      |
| 15 Gga.18411.1.S1_at       | 4.46        | MAPIB          | Finished cDNA, clone ChEST135m12                             |
| 16 Gga.534.1.S1_at         | 4.43        | KCNG4          | potassium voltage-gated channel, subfamily G, member 4       |
| 17 Gga.6936.1.A1_at        | 4.40        |                | similar to NP_002074.2 glutathione peroxidase 2              |
| 18 Gga.9490.1.S1_at        | 4.34        | RGS9BP         | regulator of G protein signalling 9 binding protein          |
| 19 Gga.4732.3.S1_a_at      | 4.28        | LRP11          | low density lipoprotein receptor-related protein 11          |
| 20 GgaAffx.10770.1.S1_s_at | 4.12        | LOC418738      | similar to Family with sequence similarity 70, member B      |
| 21 GgaAffx.9799.1.S1_at    | 4.11        | TMPRSS7        | transmembrane protease, serine 7                             |
| 22 Gga.18411.1.A1_at       | 4.06        | MAPIB          | Finished cDNA, clone ChEST135m12                             |
| 23 GgaAffx.9805.1.S1_s_at  | 4.01        | TMPRSS7        | transmembrane protease, serine 7                             |
| 24 Gga.6162.1.S1_s_at      | 3.98        | SPTBN5         | spectrin, beta, non-erythrocytic 5                           |
| 25 GgaAffx.9805.1.S1_at    | 3.92        | TMPRSS7        | transmembrane protease, serine 7                             |
| 26 Gga.9088.1.S1_at        | 3.88        | SS2            | somatostatin II                                              |
| 27 Gga.19591.1.S1_at       | 3.84        | LOC428770      | prematurely terminated mRNA decay factor-like                |
| 28 Gga.3351.1.S1_at        | 3.84        | SNCG           | synuclein, gamma (breast cancer-specific protein 1)          |
| 29 Gga.8293.1.S1_at        | 3.81        | LOC421740      | similar to ST3A1                                             |
| 30 GgaAffx.26446.2.S1_s_at | 3.81        | LOC769847      | similar to Glutathione S-transferase theta 1                 |
| 31 Gga.749.1.S1_at         | 3.79        | PLS1           | plastin 1 (I isoform)                                        |
| 32 Gga.10218.2.S1_s_at     | 3.78        |                | Finished cDNA, clone ChEST571n22                             |
| 33 Gga.6265.1.S1_at        | 3.78        | LOC769847      | similar to Glutathione S-transferase theta 1                 |
| 34 GgaAffx.25860.1.S1_at   | 3.65        | LOC428272      | similar to pepsinogen C                                      |
| 35 GgaAffx.1175.2.S1_at    | 3.60        | LOXHD1         | lipoxigenase homology domains 1                              |
| 36 Gga.11688.1.S1_at       | 3.46        | TSGA14         | testis specific, 14                                          |
| 37 GgaAffx.6919.1.S1_at    | 3.44        | PTPRQ          | protein tyrosine phosphatase, receptor type, Q               |
| 38 GgaAffx.3438.1.S1_at    | 3.43        |                |                                                              |
| 39 Gga.4317.1.S1_a_at      | 3.42        |                | calcium channel, voltage-dependent, N type, alpha 1B subunit |
| 40 Gga.3419.1.S1_at        | 3.41        | LOC423385      | similar to neurexin III beta                                 |
| 41 GgaAffx.10527.1.S1_at   | 3.40        | KCNF1          | potassium voltage-gated channel, subfamily F, member 1       |
| 42 Gga.2709.1.S1_at        | 3.36        | AMPH           | amphiphysin                                                  |
| 43 Gga.4732.1.S1_at        | 3.32        | LRP11          | low density lipoprotein receptor-related protein 11          |
| 44 Gga.16719.1.S1_at       | 3.27        |                | Finished cDNA, clone ChEST537o4                              |
| 45 Gga.254.1.S1_at         | 3.24        | KCNJ2          | potassium inwardly-rectifying channel, subfamily J, member 2 |
| 46 Gga.9773.1.S1_s_at      | 3.23        | RBM24          | RNA binding motif protein 24                                 |
| 47 GgaAffx.5611.1.S1_at    | 3.22        | CERKL          | ceramide kinase-like                                         |
| 48 Gga.7809.1.S1_at        | 3.20        | LOC771069      | Hypothetical protein LOC771069; homology to sniffer          |
| 49 Gga.8771.1.S1_at        | 3.17        | FGFRL1         | fibroblast growth factor receptor-like 1                     |
| 50 Gga.5690.1.S1_s_at      | 3.14        | LOC768866      | RNA-binding protein 38                                       |
| 51 Gga.11985.1.S1_at       | 3.14        | ELMOD1         | ELMO/CED-12 domain containing 1                              |
| 52 Gga.11242.1.S1_at       | 3.14        | HES5           | hairy and enhancer of split 5 (Drosophila)                   |
| 53 Gga.9795.1.S1_at        | 3.11        | CIB2           | calcium and integrin binding family member 2                 |
| 54 Gga.5880.1.S1_at        | 3.10        |                | Transcribed locus                                            |
| 55 GgaAffx.4750.1.S1_at    | 3.07        |                |                                                              |
| 56 GgaAffx.7642.1.S1_at    | 3.05        | DCLK3          | doublecortin-like kinase 3                                   |
| 57 GgaAffx.22744.1.S1_at   | 3.04        | PTPRZ1         | protein tyrosine phosphatase, receptor-type, Z polypeptide 1 |
| 58 GgaAffx.26657.2.S1_s_at | 3.03        | TMCC2          | transmembrane and coiled-coil domain family 2                |
| 59 GgaAffx.9042.5.S1_at    | 2.99        | LOC425756      | similar to Alpha-2-macroglobulin precursor (Alpha-2-M)       |
| 60 Gga.10266.1.S1_at       | 2.98        | LOC429955      | Similar to RAB15                                             |
| 61 Gga.18610.1.S1_at       | 2.96        |                | Finished cDNA, clone ChEST198i4                              |
| 62 Gga.329.1.S1_at         | 2.95        | HAS2           | hyaluronan synthase 2                                        |
| 63 Gga.1507.1.S1_at        | 2.94        | ISL1           | ISL LIM homeobox 1                                           |
| 64 GgaAffx.26416.1.S1_at   | 2.93        | LOC416899      | hypothetical LOC416899, Myosin IC                            |
| 65 Gga.16773.1.S1_at       | 2.93        |                | Finished cDNA, clone ChEST489i19                             |
| 66 GgaAffx.2958.1.S1_at    | 2.92        | SCG3           | secretogranin III                                            |

|     |                         |      |           |                                                                          |
|-----|-------------------------|------|-----------|--------------------------------------------------------------------------|
| 67  | Gga.7394.1.S1_s_at      | 2.89 | CCDC40    | coiled-coil domain containing 40                                         |
| 68  | Gga.17989.1.S1_at       | 2.88 |           | Finished cDNA, clone ChEST114h1                                          |
| 69  | GgaAffx.11584.1.S1_s_at | 2.85 | RBM24     | RNA binding motif protein 24                                             |
| 70  | GgaAffx.3515.1.S1_s_at  | 2.84 | LOC416899 | hypothetical LOC416899, Myosin IC                                        |
| 71  | Gga.5568.1.S1_at        | 2.84 |           | Finished cDNA, clone ChEST576b15                                         |
| 72  | GgaAffx.21678.1.S1_at   | 2.83 |           | Finished cDNA, clone ChEST752o4                                          |
| 73  | Gga.7683.1.S1_at        | 2.82 | EMX2      | empty spiracles homeobox 2                                               |
| 74  | GgaAffx.4848.1.S1_s_at  | 2.81 | CBLN4     | cerebellin 4 precursor                                                   |
| 75  | Gga.14660.1.S1_at       | 2.80 |           | Finished cDNA, clone ChEST443e7                                          |
| 76  | GgaAffx.4233.1.S1_at    | 2.79 | PLSCR5    | phospholipid scramblase family, member 5                                 |
| 77  | GgaAffx.10777.1.S1_s_at | 2.76 | LOC418747 | Guanine nucleotide exchange factor DBS (DBLs big sister)                 |
| 78  | Gga.10720.1.S1_at       | 2.75 |           | Finished cDNA, clone ChEST613c7                                          |
| 79  | Gga.12014.1.S1_at       | 2.72 |           | Finished cDNA, clone ChEST582i7                                          |
| 80  | Gga.4971.1.S1_at        | 2.72 | KCNAB1    | potassium voltage-gated channel, shaker-related subfamily, beta member 1 |
| 81  | Gga.10168.1.S1_at       | 2.71 | SCN3B     | sodium channel, voltage-gated, type III, beta                            |
| 82  | Gga.13024.1.S1_at       | 2.71 |           | Finished cDNA, clone ChEST62i12                                          |
| 83  | GgaAffx.12413.1.S1_at   | 2.71 | LOC768866 | hypothetical protein LOC768866                                           |
| 84  | Gga.16208.1.S1_at       | 2.68 |           | Finished cDNA, clone ChEST1020m19                                        |
| 85  | Gga.8209.1.S1_at        | 2.68 | LOC776169 | similar to Proline rich 15                                               |
| 86  | Gga.3698.1.A1_s_at      | 2.68 | LOC416899 | hypothetical LOC416899, Myosin IC                                        |
| 87  | Gga.15234.1.S1_at       | 2.65 | REEP6     | receptor accessory protein 6                                             |
| 88  | Gga.16746.1.S1_at       | 2.64 |           | Finished cDNA, clone ChEST248e23                                         |
| 89  | Gga.3219.1.S1_at        | 2.63 | FIGF      | c-fos induced growth factor (vascular endothelial growth factor D)       |
| 90  | Gga.15941.1.S1_at       | 2.60 |           | Finished cDNA, clone ChEST886k2                                          |
| 91  | Gga.14273.1.S1_at       | 2.60 |           | Finished cDNA, clone ChEST39a8                                           |
| 92  | Gga.15910.1.S1_at       | 2.58 |           | Finished cDNA, clone ChEST225o19                                         |
| 93  | Gga.2833.1.S1_at        | 2.57 | SNF1LK    | SNF1-like kinase                                                         |
| 94  | Gga.446.1.S1_at         | 2.56 | ETV4      | ets variant gene 4 (E1A enhancer binding protein, E1AF)                  |
| 95  | Gga.250.1.S1_at         | 2.55 | ESPN      | espin                                                                    |
| 96  | Gga.16377.1.S1_at       | 2.55 |           | Finished cDNA, clone ChEST491b6                                          |
| 97  | Gga.16130.1.S1_at       | 2.53 |           | Finished cDNA, clone ChEST424a5                                          |
| 98  | Gga.2558.3.S1_a_at      | 2.53 | COL14A1   | collagen, type XIV, alpha 1 (undulin)                                    |
| 99  | GgaAffx.24033.1.S1_s_at | 2.52 | DGKI      | diacylglycerol kinase, iota                                              |
| 100 | Gga.7011.1.S1_a_at      | 2.52 | LOC419195 | similar to cAMP-dependent protein kinase inhibitor gamma                 |
| 101 | GgaAffx.26108.1.S1_at   | 2.52 | FAM81A    | family with sequence similarity 81, member A                             |
| 102 | Gga.13867.1.S1_at       | 2.52 |           | Finished cDNA, clone ChEST373j18                                         |
| 103 | GgaAffx.8249.1.S1_at    | 2.50 |           |                                                                          |
| 104 | GgaAffx.9503.1.S1_at    | 2.49 | LOC431596 | hypothetical LOC431596                                                   |
| 105 | GgaAffx.4551.1.S1_at    | 2.48 | GABRA3    | gamma-aminobutyric acid (GABA) A receptor, alpha 3                       |
| 106 | Gga.127.1.S1_at         | 2.43 | NR1H4     | nuclear receptor subfamily 1, group H, member 4                          |
| 107 | GgaAffx.3582.1.S1_s_at  | 2.43 | SQRDL     | sulfide quinone reductase-like (yeast)                                   |
| 108 | Gga.11650.2.S1_at       | 2.43 | GCNT7     | glucosaminyl (N-acetyl) transferase family member 7                      |
| 109 | GgaAffx.9284.1.S1_at    | 2.42 | MCTP1     | multiple C2 domains, transmembrane 1                                     |
| 110 | GgaAffx.6070.1.S1_at    | 2.41 | USH2A     | Usher syndrome 2A (autosomal recessive, mild)                            |
| 111 | GgaAffx.4787.1.S1_at    | 2.41 | LOC771511 | hypothetical protein LOC771511                                           |
| 112 | Gga.19798.1.S1_at       | 2.40 |           | Finished cDNA, clone ChEST729a22                                         |
| 113 | Gga.13251.1.S1_at       | 2.40 |           | Finished cDNA, clone ChEST1034i22                                        |
| 114 | Gga.15374.1.S1_at       | 2.38 |           | Finished cDNA, clone ChEST879c9                                          |
| 115 | GgaAffx.24033.2.S1_s_at | 2.38 | DGKI      | diacylglycerol kinase, iota                                              |
| 116 | Gga.10809.1.S1_at       | 2.38 | LRR6      | leucine rich repeat containing 6                                         |
| 117 | Gga.216.1.S1_at         | 2.38 | SLC34A2   | solute carrier family 34 (sodium phosphate), member 2                    |
| 118 | GgaAffx.4160.1.S1_at    | 2.38 | LOC428160 | similar to RY2G5                                                         |
| 119 | Gga.13522.2.S1_a_at     | 2.37 |           | Finished cDNA, clone ChEST398i23                                         |
| 120 | Gga.14031.1.S1_at       | 2.37 |           | Finished cDNA, clone ChEST254i23                                         |
| 121 | GgaAffx.4623.1.S1_at    | 2.35 | LOC420482 | hypothetical LOC420482                                                   |
| 122 | GgaAffx.20484.1.S1_at   | 2.34 |           | Finished cDNA, clone ChEST651d6                                          |
| 123 | Gga.14469.1.S1_at       | 2.34 |           | Finished cDNA, clone ChEST328j11                                         |
| 124 | Gga.8515.1.S1_at        | 2.33 | LHFPL5    | lipoma HMGIC fusion partner-like 5                                       |
| 125 | GgaAffx.1272.1.S1_at    | 2.33 | TTL10     | tubulin tyrosine ligase-like family, member 10                           |
| 126 | Gga.13131.1.S1_at       | 2.32 | CAPRN2    | Caprin family member 2                                                   |
| 127 | Gga.19395.1.S1_at       | 2.31 | SMTNL2    | smoothelin-like 2                                                        |
| 128 | Gga.19116.1.S1_at       | 2.30 | LOC423451 | Hypothetical LOC423451                                                   |
| 129 | Gga.3698.1.A1_at        | 2.30 | LOC416899 | hypothetical LOC416899                                                   |
| 130 | Gga.216.1.S2_at         | 2.29 | SLC34A2   | solute carrier family 34 (sodium phosphate), member 2                    |
| 131 | GgaAffx.11711.1.S1_s_at | 2.28 | SNAP91    | synaptosomal-associated protein, 91kDa homolog (mouse)                   |
| 132 | GgaAffx.24056.1.S1_s_at | 2.27 | CAPRN2    | caprin family member 2                                                   |
| 133 | Gga.17595.1.S1_at       | 2.27 | CDK5RAP2  | CDK5 regulatory subunit associated protein 2                             |

|     |                         |      |             |                                                                                  |
|-----|-------------------------|------|-------------|----------------------------------------------------------------------------------|
| 134 | Gga.2070.2.S1_a_at      | 2.26 | ID4         | inhibitor of DNA binding 4, dominant negative helix-loop-helix protein           |
| 135 | GgaAffx.21044.1.S1_s_at | 2.25 | DACT2       | Dapper, antagonist of beta-catenin, homolog 2                                    |
| 136 | GgaAffx.24481.1.S1_at   | 2.25 | GPR98       | G protein-coupled receptor 98, very large G-protein-coupled receptor-1           |
| 137 | Gga.282.1.S1_at         | 2.25 | POU4F3      | POU class 4 homeobox 3                                                           |
| 138 | GgaAffx.9571.1.S1_s_at  | 2.23 | WASF1       | WAS protein family, member 1                                                     |
| 139 | Gga.2558.1.S1_a_at      | 2.23 | COL14A1     | collagen, type XIV, alpha 1 (undulin)                                            |
| 140 | Gga.4668.1.S1_at        | 2.23 | DNER        | delta/notch-like EGF repeat containing                                           |
| 141 | Gga.18993.1.S1_at       | 2.23 | DGKI        | diacylglycerol kinase, iota                                                      |
| 142 | Gga.12367.1.S1_at       | 2.21 | ROPN1L      | ropporin 1-like                                                                  |
| 143 | Gga.14119.1.S1_a_at     | 2.21 |             | Finished cDNA, clone ChEST83b18                                                  |
| 144 | Gga.9664.1.S1_at        | 2.21 | WDR60       | WD repeat domain 60                                                              |
| 145 | Gga.12286.1.S1_at       | 2.20 | TAC1        | tachykinin, precursor 1                                                          |
| 146 | GgaAffx.20377.1.S1_at   | 2.19 |             | Finished cDNA, clone ChEST914n3                                                  |
| 147 | Gga.3337.1.S1_at        | 2.18 | MUC5B       | mucin 5B, oligomeric mucus/gel-forming                                           |
| 148 | GgaAffx.8541.1.S1_at    | 2.18 | LOC430522   | hypothetical LOC430522                                                           |
| 149 | GgaAffx.3782.1.S1_at    | 2.18 | SMTNL2      | smoothelin-like 2                                                                |
| 150 | Gga.8360.1.S1_at        | 2.17 | ATOH8       | atonal homolog 8                                                                 |
| 151 | Gga.3225.1.S1_at        | 2.17 | MYH11       | myosin, heavy chain 11, smooth muscle                                            |
| 152 | Gga.19984.1.S1_at       | 2.17 | LOC417126   | beta-1,3-N-acetylglucosaminyltransferase bGnT-5                                  |
| 153 | Gga.19916.1.S1_at       | 2.16 |             | Finished cDNA, clone ChEST799c18                                                 |
| 154 | Gga.8540.1.S1_at        | 2.16 |             | Finished cDNA, clone ChEST879k19                                                 |
| 155 | Gga.7476.1.S1_at        | 2.16 | TMEM108     | transmembrane protein 108                                                        |
| 156 | Gga.10344.1.S1_at       | 2.15 | ELOVL4      | elongation of very long chain fatty acids-like 4                                 |
| 157 | GgaAffx.10169.1.S1_at   | 2.15 | B3GAT2      | beta-1,3-glucuronyltransferase 2 (glucuronosyltransferase S)                     |
| 158 | Gga.7640.1.S1_a_at      | 2.14 | ACSL4       | acyl-CoA synthetase long-chain family member 4                                   |
| 159 | GgaAffx.6434.1.S1_s_at  | 2.14 | LOC417860   | LOC417860                                                                        |
| 160 | GgaAffx.3400.1.S1_s_at  | 2.14 | LOC416539   | hypothetical LOC416539                                                           |
| 161 | Gga.7412.1.S1_s_at      | 2.14 | RCJMB04_2h7 | similar to MGC69149 protein                                                      |
| 162 | GgaAffx.6473.1.A1_at    | 2.13 |             |                                                                                  |
| 163 | Gga.7658.1.S1_at        | 2.13 |             | Finished cDNA, clone ChEST417c16                                                 |
| 164 | Gga.12904.1.S1_at       | 2.12 | NPTX2       | neuronal pentraxin II                                                            |
| 165 | Gga.19763.1.S1_at       | 2.12 | LOC418495   | similar to Fat cell-specific low molecular weight protein (B27)                  |
| 166 | Gga.15945.1.S1_at       | 2.10 |             | Finished cDNA, clone ChEST134g18                                                 |
| 167 | Gga.696.1.A1_at         | 2.10 | BDNF        | brain-derived neurotrophic factor                                                |
| 168 | Gga.7581.1.S1_at        | 2.10 |             | Finished cDNA, clone ChEST88511                                                  |
| 169 | Gga.13008.1.S1_at       | 2.10 |             | Finished cDNA, clone ChEST11k17                                                  |
| 170 | Gga.8834.1.S1_at        | 2.10 | KCNA10      | potassium voltage-gated channel, shaker-related subfamily, member 10             |
| 171 | Gga.5690.2.S1_at        | 2.09 | LOC768866   | hypothetical protein LOC768866                                                   |
| 172 | GgaAffx.20471.1.S1_at   | 2.09 | LOC423879   | hypothetical LOC423879                                                           |
| 173 | Gga.4445.1.S1_at        | 2.09 | NR2F2       | nuclear receptor subfamily 2, group F, member 2                                  |
| 174 | Gga.9710.1.S1_at        | 2.08 | SH2D4A      | SH2 domain containing 4A                                                         |
| 175 | GgaAffx.20456.1.S1_s_at | 2.08 | LOC420939   | LOC420939                                                                        |
| 176 | Gga.13978.1.S1_s_at     | 2.07 | LHFPL5      | lipoma HMGIC fusion partner-like 5                                               |
| 177 | Gga.17118.1.S1_at       | 2.07 |             | Finished cDNA, clone ChEST745p13                                                 |
| 178 | Gga.7699.1.S1_at        | 2.05 | RIBC2       | RIB43A domain with coiled-coils 2                                                |
| 179 | Gga.3204.1.S1_at        | 2.03 | C7orf23     | chromosome 7 open reading frame 23                                               |
| 180 | Gga.7640.2.S1_at        | 2.02 | ACSL4       | Acyl-CoA synthetase long-chain family member 4                                   |
| 181 | Gga.9307.1.S1_at        | 2.02 | NPTX2       | neuronal pentraxin II                                                            |
| 182 | Gga.8801.1.S1_at        | 2.02 |             | Transcribed locus                                                                |
| 183 | Gga.11034.1.S1_at       | 2.02 | ROBO1       | roundabout, axon guidance receptor, homolog 1                                    |
| 184 | GgaAffx.25955.1.S1_s_at | 2.00 | PLAT        | plasminogen activator, tissue                                                    |
| 185 | Gga.12952.1.S1_at       | 2.00 | INPP5B      | inositol polyphosphate-5-phosphatase, 75kDa                                      |
| 186 | GgaAffx.12430.1.S1_s_at | 2.00 | FAM60A      | family with sequence similarity 60, member A                                     |
| 187 | Gga.12882.1.S1_at       | 2.00 | LOC421446   | chromosome 6 open reading frame 206; mitochondrial ribosomal protein S18A-like 1 |
| 188 | Gga.18576.1.S1_at       | 1.99 | SPTLC3      | serine palmitoyltransferase, long chain base subunit 3                           |
| 189 | Gga.10349.1.S1_at       | 1.99 | C11orf70    | chromosome 11 open reading frame 70                                              |
| 190 | GgaAffx.1354.1.S1_at    | 1.99 |             |                                                                                  |
| 191 | GgaAffx.21005.1.S1_at   | 1.99 |             | Finished cDNA, clone ChEST331i1                                                  |
| 192 | Gga.7364.1.S1_a_at      | 1.98 | TESC        | tescalcin                                                                        |
| 193 | Gga.652.1.S1_at         | 1.98 | AVP         | arginine vasopressin (neurophysin II, antidiuretic hormone)                      |
| 194 | Gga.10745.1.S1_s_at     | 1.97 | CYP4V2      | cytochrome P450, family 4, subfamily V, polypeptide 2                            |
| 195 | Gga.3398.2.S1_a_at      | 1.97 | PITX2       | paired-like homeodomain 2                                                        |
| 196 | Gga.14762.1.S1_at       | 1.97 |             | Finished cDNA, clone ChEST103n10                                                 |
| 197 | Gga.16228.1.S1_at       | 1.97 | FAM81A      | family with sequence similarity 81, member A                                     |
| 198 | GgaAffx.21576.1.S1_s_at | 1.94 | CHGA        | chromogranin A (parathyroid secretory protein 1)                                 |
| 199 | Gga.19033.1.S1_at       | 1.94 |             | Finished cDNA, clone ChEST727m19                                                 |
| 200 | GgaAffx.697.1.S1_s_at   | 1.93 | CCDC135     | coiled-coil domain containing 135                                                |

|     |                         |      |           |                                                                                  |
|-----|-------------------------|------|-----------|----------------------------------------------------------------------------------|
| 201 | Gga.5327.1.S1_a_at      | 1.91 | LOC419508 | similar to Phosphopantothencysteine synthetase                                   |
| 202 | Gga.4732.3.S1_at        | 1.91 | LRP11     | low density lipoprotein receptor-related protein 11                              |
| 203 | Gga.11023.1.S1_at       | 1.91 | GLTP      | Glycolipid transfer protein                                                      |
| 204 | GgaAffx.22776.1.S1_at   | 1.91 | UNQ2541   | MSFL2541                                                                         |
| 205 | Gga.1231.1.S1_at        | 1.90 |           | Transcribed locus                                                                |
| 206 | Gga.9319.1.S1_at        | 1.87 | ADPRHL1   | ADP-ribosylhydrolase like 1                                                      |
| 207 | Gga.12437.2.S1_at       | 1.87 | CHGA      | chromogranin A (parathyroid secretory protein 1)                                 |
| 208 | Gga.7422.1.S1_at        | 1.87 | PPP1R14D  | protein phosphatase 1, regulatory (inhibitor) subunit 14D                        |
| 209 | GgaAffx.10841.1.S1_s_at | 1.87 | LMO7      | LIM domain 7                                                                     |
| 210 | GgaAffx.22475.1.S1_s_at | 1.87 | COPG2     | coatamer protein complex, subunit gamma 2                                        |
| 211 | Gga.4416.1.S1_at        | 1.86 | SERPINI1  | serpin peptidase inhibitor, clade I (neuroserpin), member 1                      |
| 212 | Gga.1503.1.S1_at        | 1.86 |           | Finished cDNA, clone ChEST360i19                                                 |
| 213 | Gga.8684.1.S1_at        | 1.85 | LOC425441 | similar to Sodium bicarbonate cotransporter 3 (Solute carrier family 4 member 7) |
| 214 | GgaAffx.11103.1.S1_at   | 1.85 | DNAJB13   | DnaJ (Hsp40) related, subfamily B, member 13                                     |
| 215 | Gga.12498.1.S1_at       | 1.85 | RAB19     | RAB19, member RAS oncogene family                                                |
| 216 | Gga.16342.1.S1_at       | 1.84 | RNASET2   | ribonuclease T2                                                                  |
| 217 | Gga.10510.1.S1_at       | 1.83 | RSPH1     | radial spoke head 1 homolog                                                      |
| 218 | Gga.16207.1.S1_s_at     | 1.83 | PPP2R3A   | protein phosphatase 2 (formerly 2A), regulatory subunit B", alpha                |
| 219 | Gga.16974.1.S1_at       | 1.83 | LOC770178 | similar to Caldendrin, isoform S2                                                |
| 220 | GgaAffx.7042.1.S1_at    | 1.83 | MAPK10    | mitogen-activated protein kinase 10                                              |
| 221 | GgaAffx.12439.1.S1_s_at | 1.82 | TNFAIP8L1 | tumor necrosis factor, alpha-induced protein 8-like 1                            |
| 222 | Gga.16271.1.S1_at       | 1.82 | NAV2      | Neuron navigator 2                                                               |
| 223 | GgaAffx.1581.1.S1_s_at  | 1.82 | SH2D4B    | SH2 domain containing 4B                                                         |
| 224 | Gga.18206.1.S1_at       | 1.82 |           | Finished cDNA, clone ChEST1002c13                                                |
| 225 | GgaAffx.3631.1.S1_at    | 1.80 | KREMEN1   | kringle containing transmembrane protein 1                                       |
| 226 | Gga.16470.1.S1_at       | 1.79 |           | Finished cDNA, clone ChEST110k2                                                  |
| 227 | Gga.11984.1.S1_at       | 1.79 | LOC425008 | similar to ADMP                                                                  |
| 228 | Gga.11827.2.S1_a_at     | 1.79 | LOC415531 | similar to organic solute transporter beta                                       |
| 229 | Gga.467.1.S1_at         | 1.78 | TBX19     | t-box 19                                                                         |
| 230 | Gga.8439.1.S1_at        | 1.78 |           | Finished cDNA, clone ChEST395i15                                                 |
| 231 | GgaAffx.20568.1.S1_s_at | 1.78 | MAP7      | microtubule-associated protein 7                                                 |
| 232 | Gga.19320.1.S1_at       | 1.78 | LOC426510 | hypothetical gene supported by CR406681                                          |
| 233 | Gga.7526.1.S1_at        | 1.77 | HS3ST1    | heparan sulfate (glucosamine) 3-O-sulfotransferase 1                             |
| 234 | GgaAffx.10620.1.S1_at   | 1.77 | FRMPD4    | FERM and PDZ domain containing 4                                                 |
| 235 | Gga.16831.1.S1_at       | 1.77 | CDH8      | Cadherin 8, type 2                                                               |
| 236 | Gga.5647.1.S1_at        | 1.77 | WDR16     | WD repeat domain 16                                                              |
| 237 | Gga.436.1.S1_at         | 1.76 | BRN-3A    | POU domain factor                                                                |
| 238 | GgaAffx.21557.1.S1_at   | 1.76 |           | Finished cDNA, clone ChEST563p19                                                 |
| 239 | Gga.18988.1.S1_at       | 1.76 | MADD      | MAP-kinase activating death domain                                               |
| 240 | Gga.7679.1.S1_at        | 1.76 | GPSM2     | G-protein signaling modulator 2 (AGS3-like, C. elegans)                          |
| 241 | Gga.1817.1.S1_at        | 1.76 | SALL1     | sal-like 1 (Drosophila)                                                          |
| 242 | Gga.17466.1.S1_at       | 1.75 |           | Finished cDNA, clone ChEST889i23                                                 |
| 243 | Gga.3180.1.S2_a_at      | 1.75 | LFNG      | LFNG O-fucosylpeptide 3-beta-N-acetylglucosaminyltransferase                     |
| 244 | GgaAffx.20535.1.S1_at   | 1.75 |           | Finished cDNA, clone ChEST1015a13                                                |
| 245 | Gga.8578.1.S1_at        | 1.75 |           | Transcribed locus                                                                |
| 246 | GgaAffx.12475.1.S1_at   | 1.75 | TRAF5     | TNF receptor-associated factor 5                                                 |
| 247 | Gga.19953.1.S1_s_at     | 1.75 | C10orf63  | chromosome 10 open reading frame 63                                              |
| 248 | Gga.2437.1.S1_at        | 1.74 | GSTT1     | glutathione S-transferase theta 1                                                |
| 249 | Gga.12019.1.S1_at       | 1.74 | KIAA1715  | KIAA1715                                                                         |
| 250 | Gga.10938.1.S1_at       | 1.74 |           | Finished cDNA, clone ChEST752i21                                                 |
| 251 | GgaAffx.23502.1.S1_at   | 1.74 | PPP2R3A   | protein phosphatase 2 (formerly 2A), regulatory subunit B", alpha                |
| 252 | GgaAffx.2163.1.S1_at    | 1.73 |           |                                                                                  |
| 253 | Gga.15609.1.S1_at       | 1.73 |           | Transcribed locus                                                                |
| 254 | Gga.3426.1.S1_a_at      | 1.73 | FZD8      | frizzled homolog 8                                                               |
| 255 | Gga.5784.1.S1_at        | 1.73 | TMEM121   | transmembrane protein 121                                                        |
| 256 | Gga.7742.1.S1_at        | 1.73 |           | Finished cDNA, clone ChEST1032j13                                                |
| 257 | Gga.17551.1.S1_at       | 1.72 | SMS       | spermine synthase                                                                |
| 258 | GgaAffx.10526.2.S1_s_at | 1.72 | ATP6V1C2  | ATPase, H+ transporting, lysosomal 42kDa, V1 subunit C2                          |
| 259 | Gga.14814.1.S1_s_at     | 1.72 | CENPO     | centromere protein O                                                             |
| 260 | Gga.17257.1.S1_at       | 1.71 | LOC424111 | hypothetical gene supported by CR391210                                          |
| 261 | GgaAffx.25817.1.S1_s_at | 1.71 | LOC417161 | similar to RP11-23J9.1                                                           |
| 262 | Gga.16552.2.S1_a_at     | 1.70 | LOC421780 | hypothetical gene supported by CR387685                                          |
| 263 | GgaAffx.1421.4.S1_s_at  | 1.70 | DGKQ      | diacylglycerol kinase, theta 110kDa                                              |
| 264 | Gga.11811.1.S1_at       | 1.70 | CXorf41   | chromosome X open reading frame 41                                               |
| 265 | GgaAffx.21542.1.S1_at   | 1.70 |           | Finished cDNA, clone ChEST563i4                                                  |
| 266 | Gga.9687.1.S1_at        | 1.70 | LOC422721 | similar to CDNA sequence BC035537                                                |
| 267 | Gga.18155.1.S1_at       | 1.69 |           | Finished cDNA, clone ChEST274o24                                                 |

|     |                         |      |              |                                                                              |
|-----|-------------------------|------|--------------|------------------------------------------------------------------------------|
| 268 | Gga.13496.1.S1_at       | 1.69 |              | Finished cDNA, clone ChEST710j19                                             |
| 269 | Gga.15220.1.S1_at       | 1.69 | BAIAP2L2     | BAI1-associated protein 2-like 2                                             |
| 270 | Gga.19009.1.S1_at       | 1.69 |              | Finished cDNA, clone ChEST184b5                                              |
| 271 | Gga.12045.1.S1_at       | 1.69 | TPST1        | tyrosylprotein sulfotransferase 1                                            |
| 272 | Gga.6988.1.S1_at        | 1.69 | CALML4       | calmodulin-like 4                                                            |
| 273 | Gga.7424.1.S1_at        | 1.68 | LOC421656    | similar to synaptojanin 2                                                    |
| 274 | Gga.2814.1.S1_at        | 1.68 |              | Transcribed locus                                                            |
| 275 | Gga.8266.1.S1_at        | 1.68 |              | Finished cDNA, clone ChEST835a14                                             |
| 276 | Gga.5878.1.S1_at        | 1.68 | MICALL2      | MICAL-like 2                                                                 |
| 277 | Gga.11629.1.S1_at       | 1.68 |              | Transcribed locus                                                            |
| 278 | Gga.3147.1.S1_at        | 1.68 | MYO6         | myosin VI                                                                    |
| 279 | Gga.16552.1.S1_a_at     | 1.68 | LOC421780    | hypothetical gene supported by CR387685                                      |
| 280 | Gga.15523.1.S1_at       | 1.67 |              | Transcribed locus                                                            |
| 281 | Gga.18915.1.S1_at       | 1.66 | CDK8         | cyclin-dependent kinase 8                                                    |
| 282 | Gga.6489.1.S1_at        | 1.66 | LOC417380    | similar to Coiled-coil domain containing 57                                  |
| 283 | GgaAffx.26115.1.A1_at   | 1.66 | LOC424026    | hypothetical gene supported by CR387553                                      |
| 284 | Gga.13301.1.S1_at       | 1.66 | GDPD5        | glycerophosphodiester phosphodiesterase domain containing 5                  |
| 285 | Gga.9295.1.S1_at        | 1.65 |              |                                                                              |
| 286 | GgaAffx.755.1.S1_at     | 1.65 | LOC419719    | similar to KIAA1867 protein                                                  |
| 287 | Gga.14968.1.S1_at       | 1.65 |              | Finished cDNA, clone ChEST131d10                                             |
| 288 | GgaAffx.12873.1.S1_at   | 1.64 | RCJMB04_25e3 | spermatid perinuclear RNA binding protein                                    |
| 289 | GgaAffx.25272.2.S1_s_at | 1.64 | WWC1         | WW and C2 domain containing 1                                                |
| 290 | Gga.5731.1.S1_at        | 1.64 |              | Finished cDNA, clone ChEST752d2                                              |
| 291 | Gga.3286.1.S1_at        | 1.63 | CALB1        | calbindin 1, 28kDa                                                           |
| 292 | GgaAffx.9740.1.S1_at    | 1.63 | ARMC2        | armadillo repeat containing 2                                                |
| 293 | Gga.18618.1.S1_at       | 1.63 | C14orf166B   | chromosome 14 open reading frame 166B                                        |
| 294 | GgaAffx.24260.1.S1_s_at | 1.63 | LOC421656    | similar to synaptojanin 2                                                    |
| 295 | Gga.1479.1.S1_at        | 1.63 | PTN          | pleiotrophin (heparin binding growth factor 8)                               |
| 296 | GgaAffx.1314.1.S1_at    | 1.63 | FNDC7        | fibronectin type III domain containing 7                                     |
| 297 | Gga.14379.1.S1_at       | 1.62 |              | Finished cDNA, clone ChEST530a24                                             |
| 298 | Gga.13056.1.S1_at       | 1.62 |              | Finished cDNA, clone ChEST323h10                                             |
| 299 | GgaAffx.13142.1.S1_at   | 1.62 | LOC424067    | similar to DNA polymerase-transactivated protein 6                           |
| 300 | Gga.8140.1.S1_at        | 1.62 | FGFBP1       | fibroblast growth factor binding protein 1                                   |
| 301 | Gga.7002.1.S1_at        | 1.62 | FBXW8        | F-box and WD repeat domain containing 8                                      |
| 302 | Gga.8958.1.S1_at        | 1.62 |              | Transcribed locus                                                            |
| 303 | GgaAffx.7275.3.S1_s_at  | 1.61 | RPS6KA2      | ribosomal protein S6 kinase, 90kDa, polypeptide 2                            |
| 304 | GgaAffx.12528.1.S1_at   | 1.61 | CENPO        | centromere protein O                                                         |
| 305 | Gga.11903.1.S1_at       | 1.61 | GRAMD3       | GRAM domain containing 3                                                     |
| 306 | Gga.16409.1.S1_at       | 1.60 |              | Finished cDNA, clone ChEST350d21                                             |
| 307 | GgaAffx.6570.1.S1_at    | 1.60 | LOC422518    | hypothetical LOC422518                                                       |
| 308 | Gga.3904.1.S1_at        | 1.60 | RCJMB04_8a2  | Similar to Zgc:63829                                                         |
| 309 | Gga.12122.1.S1_at       | 1.60 | TMEM60       | transmembrane protein 60                                                     |
| 310 | Gga.6207.1.S1_at        | 1.60 | LOC768819    | hypothetical protein LOC768819                                               |
| 311 | Gga.17202.1.S1_s_at     | 1.60 | WWC1         | WW and C2 domain containing 1                                                |
| 312 | GgaAffx.4323.1.S1_at    | 1.59 | LOC416611    | similar to Transmembrane channel-like gene family 5                          |
| 313 | Gga.2956.1.S1_at        | 1.59 | IL22RA1      | interleukin 22 receptor, alpha 1                                             |
| 314 | Gga.7703.1.S1_s_at      | 1.59 | LOC424557    | hypothetical gene supported by BX932049                                      |
| 315 | Gga.7652.1.S1_at        | 1.59 |              | Finished cDNA, clone ChEST760m2                                              |
| 316 | Gga.16311.1.S1_at       | 1.59 |              | Finished cDNA, clone ChEST673f10                                             |
| 317 | Gga.19717.1.S1_at       | 1.59 |              | Finished cDNA, clone ChEST680h23                                             |
| 318 | Gga.3857.1.S1_s_at      | 1.59 | FANCG        | Fanconi anemia, complementation group G                                      |
| 319 | Gga.2728.1.S1_at        | 1.58 |              | Transcribed locus                                                            |
| 320 | Gga.13132.1.S1_at       | 1.58 |              | Finished cDNA, clone ChEST963b22                                             |
| 321 | Gga.14895.1.S1_at       | 1.58 |              | Finished cDNA, clone ChEST654e8                                              |
| 322 | Gga.726.2.S1_a_at       | 1.57 | CDC2         | cell division cycle 2, G1 to S and G2 to M                                   |
| 323 | Gga.6087.1.S1_at        | 1.57 |              | Finished cDNA, clone ChEST150a3                                              |
| 324 | Gga.15943.1.S1_at       | 1.56 | FAM46D       | family with sequence similarity 46, member D                                 |
| 325 | Gga.19742.1.S1_at       | 1.56 | LOC423270    | Pleckstrin homology domain containing, family H (with MyTH4 domain) member 1 |
| 326 | GgaAffx.20969.1.S1_at   | 1.56 |              | Finished cDNA, clone ChEST322a24                                             |
| 327 | Gga.9078.1.S1_at        | 1.56 | COPG2        | coatamer protein complex, subunit gamma 2                                    |
| 328 | Gga.14430.1.S1_at       | 1.56 |              | Finished cDNA, clone ChEST139n2                                              |
| 329 | Gga.6311.1.S1_at        | 1.56 | HEY1         | hairy/enhancer-of-split related with YRPW motif 1                            |
| 330 | GgaAffx.20867.1.S1_s_at | 1.55 |              | Finished cDNA, clone ChEST110k2                                              |
| 331 | Gga.16936.1.S1_at       | 1.55 | EPS8L2       | EPS8-like 2                                                                  |
| 332 | GgaAffx.20550.1.S1_s_at | 1.55 | RNF128       | Ring finger protein 128                                                      |
| 333 | Gga.15405.1.S1_at       | 1.55 |              | Finished cDNA, clone ChEST479b3                                              |
| 334 | Gga.13130.1.S1_at       | 1.55 |              | Finished cDNA, clone ChEST426c7                                              |

|     |                         |      |           |                                                                     |
|-----|-------------------------|------|-----------|---------------------------------------------------------------------|
| 335 | GgaAffx.21308.1.S1_at   | 1.55 | DCBLD1    | Discoidin, CUB and LCCL domain containing 1                         |
| 336 | Gga.16555.1.S1_at       | 1.55 |           | Transcribed locus                                                   |
| 337 | GgaAffx.21286.1.S1_at   | 1.54 | RPS24     | Ribosomal protein S24                                               |
| 338 | GgaAffx.20554.1.S1_at   | 1.54 |           | Finished cDNA, clone ChEST1021m21                                   |
| 339 | GgaAffx.21399.1.S1_s_at | 1.54 | OSBPL11   | Oxysterol binding protein-like 11                                   |
| 340 | GgaAffx.559.1.S1_at     | 1.54 |           |                                                                     |
| 341 | GgaAffx.21642.1.S1_s_at | 1.54 | WSCD2     | WSC domain containing 2                                             |
| 342 | Gga.17132.1.S1_at       | 1.53 |           | Finished cDNA, clone ChEST120n19                                    |
| 343 | GgaAffx.24843.1.S1_s_at | 1.53 | RIMS2     | regulating synaptic membrane exocytosis 2                           |
| 344 | Gga.16841.1.S1_at       | 1.53 |           | Finished cDNA, clone ChEST259h13                                    |
| 345 | Gga.19644.1.S1_at       | 1.53 |           | Finished cDNA, clone ChEST871e5                                     |
| 346 | Gga.17394.1.S1_at       | 1.53 |           | Finished cDNA, clone ChEST195j12                                    |
| 347 | Gga.8296.2.S1_a_at      | 1.52 | LOC424241 | hypothetical LOC424241                                              |
| 348 | GgaAffx.23502.2.S1_s_at | 1.52 | PPP2R3A   | protein phosphatase 2 (formerly 2A), regulatory subunit B', alpha   |
| 349 | GgaAffx.20228.1.S1_s_at | 1.52 | SHROOM3   | shroom family member 3                                              |
| 350 | Gga.5224.1.S1_at        | 1.52 | CASB      | Carbonic anhydrase VB, mitochondrial                                |
| 351 | Gga.1814.1.S1_at        | 1.52 | PUNC      | putative neuronal cell adhesion molecule                            |
| 352 | Gga.7096.1.S1_at        | 1.52 |           | Finished cDNA, clone ChEST441h10                                    |
| 353 | GgaAffx.12167.1.S1_s_at | 1.52 | DTNBP1    | dystrobrevin binding protein 1                                      |
| 354 | GgaAffx.11993.1.S1_s_at | 1.52 | WDFY2     | WD repeat and FYVE domain containing 2                              |
| 355 | Gga.6807.1.S1_at        | 1.51 |           | Finished cDNA, clone ChEST257h9                                     |
| 356 | Gga.10560.1.S1_at       | 1.51 | LOC420495 | similar to myosin IIIA; deafness, autosomal recessive 30            |
| 357 | GgaAffx.10417.3.S1_s_at | 1.51 |           |                                                                     |
| 358 | Gga.3047.1.S1_at        | 1.50 | EPHA5     | EPH receptor A5                                                     |
| 359 | GgaAffx.21399.1.S1_at   | 1.50 | OSBPL11   | Oxysterol binding protein-like 11                                   |
| 360 | Gga.16845.1.S1_at       | 1.50 |           | Finished cDNA, clone ChEST1021h20                                   |
| -   | -                       | -    |           |                                                                     |
| 361 | Gga.7528.1.S1_at        | 0.66 | KLF2      | Kruppel-like factor 2 (lung)                                        |
| 362 | Gga.5461.1.S1_at        | 0.65 |           | Finished cDNA, clone ChEST938n22                                    |
| 363 | Gga.5666.2.S1_a_at      | 0.65 |           | Finished cDNA, clone ChEST362o18                                    |
| 364 | Gga.11466.1.S1_at       | 0.65 | GPR23     | G protein-coupled receptor 23                                       |
| 365 | Gga.1657.1.S1_s_at      | 0.64 |           | Finished cDNA, clone ChEST566o24                                    |
| 366 | Gga.15834.1.S1_at       | 0.64 |           | Finished cDNA, clone ChEST40218                                     |
| 367 | Gga.19117.1.S1_at       | 0.64 |           | Finished cDNA, clone ChEST738n18                                    |
| 368 | Gga.7779.1.S1_s_at      | 0.64 |           | Finished cDNA, clone ChEST1014h19                                   |
| 369 | Gga.14195.1.S1_at       | 0.64 |           | Finished cDNA, clone ChEST542c3                                     |
| 370 | Gga.51.1.S1_at          | 0.62 | BCHE      | butyrylcholinesterase                                               |
| 371 | Gga.12928.1.S1_at       | 0.62 | VCAM1     | vascular cell adhesion molecule 1                                   |
| 372 | Gga.17167.1.S1_at       | 0.62 | GABRA1    | gamma-aminobutyric acid (GABA) A receptor, alpha 1                  |
| 373 | Gga.12377.1.S1_at       | 0.61 | TRIM13    | Tripartite motif-containing 13                                      |
| 374 | Gga.6520.1.S1_at        | 0.61 | KRT20     | keratin 20                                                          |
| 375 | Gga.5640.1.S1_at        | 0.60 | PRSS23    | Protease, serine, 23                                                |
| 376 | Gga.14852.1.S1_at       | 0.60 |           | Finished cDNA, clone ChEST32g3                                      |
| 377 | Gga.3332.1.S1_at        | 0.60 | MXRA8     | matrix-remodelling associated 8                                     |
| 378 | Gga.893.1.S1_a_at       | 0.59 | CYP24A1   | cytochrome P450, family 24, subfamily A, polypeptide 1              |
| 379 | Gga.2640.1.S1_at        | 0.59 | CFC1B     | cripto, FRL-1, cryptic family 1B                                    |
| 380 | Gga.9352.1.S1_at        | 0.58 | SLC4A7    | solute carrier family 4, sodium bicarbonate cotransporter, member 7 |
| 381 | Gga.3652.1.S1_at        | 0.58 | CLEC3B    | C-type lectin domain family 3, member B                             |
| 382 | GgaAffx.3098.1.S1_at    | 0.58 | SVOP      | SV2 related protein homolog (rat)                                   |
| 383 | Gga.14875.1.S1_at       | 0.58 |           | Finished cDNA, clone ChEST762g9                                     |
| 384 | Gga.4106.1.S1_at        | 0.58 | SLC15A1   | solute carrier family 15 (oligopeptide transporter), member 1       |
| 385 | Gga.6218.1.S1_at        | 0.57 | MFAP5     | microfibrillar associated protein 5                                 |
| 386 | Gga.4153.1.S2_a_at      | 0.57 | THY1      | Thy-1 cell surface antigen                                          |
| 387 | Gga.4091.1.S2_a_at      | 0.57 | MYLK      | myosin, light chain kinase                                          |
| 388 | Gga.19305.1.S1_at       | 0.57 | RSPO3     | R-spondin 3 homolog (Xenopus laevis)                                |
| 389 | Gga.1644.1.S1_a_at      | 0.57 | MGLL      | Monoglyceride lipase                                                |
| 390 | Gga.11969.1.S1_at       | 0.55 | CYTL1     | cytokine-like 1                                                     |
| 391 | Gga.11184.1.S1_at       | 0.55 | KCTD12    | potassium channel tetramerisation domain containing 12              |
| 392 | Gga.4798.1.S1_s_at      | 0.55 | GPM6A     | glycoprotein M6A                                                    |
| 393 | Gga.5787.1.S1_at        | 0.55 |           | Transcribed locus                                                   |
| 394 | Gga.4978.2.S1_a_at      | 0.54 | CALB2     | calbindin 2, 29kDa (calretinin)                                     |
| 395 | Gga.4978.3.S1_a_at      | 0.54 | CALB2     | calbindin 2, 29kDa (calretinin)                                     |
| 396 | Gga.4091.2.S1_a_at      | 0.53 | MYLK      | myosin, light chain kinase                                          |
| 397 | Gga.13109.1.S1_at       | 0.51 | PDE1A     | Phosphodiesterase 1A, calmodulin-dependent                          |
| 398 | Gga.3723.1.S2_at        | 0.51 | PLA2G4A   | phospholipase A2, group IVA (cytosolic, calcium-dependent)          |
| 399 | Gga.9675.1.S1_at        | 0.51 | PDGFD     | platelet derived growth factor D                                    |
| 400 | Gga.5154.1.S1_at        | 0.50 | POSTN     | periostin, osteoblast specific factor                               |

|     |                         |              |           |                                                                                  |
|-----|-------------------------|--------------|-----------|----------------------------------------------------------------------------------|
| 401 | GgaAffx.21548.1.S1_at   | <b>0.50</b>  |           | Finished cDNA, clone ChEST566c22                                                 |
| 402 | Gga.5111.1.S1_at        | <b>0.49</b>  | CCDC80    | coiled-coil domain containing 80                                                 |
| 403 | Gga.15924.1.S1_at       | <b>0.49</b>  |           | Finished cDNA, clone ChEST533d6                                                  |
| 404 | Gga.6884.1.S1_at        | <b>0.47</b>  |           | Transcribed locus                                                                |
| 405 | GgaAffx.20104.1.S1_s_at | <b>0.47</b>  | POSTN     | periostin, osteoblast specific factor                                            |
| 406 | GgaAffx.10260.1.S1_at   | <b>0.46</b>  | RSPO2     | R-spondin 2 homolog (Xenopus laevis)                                             |
| 407 | GgaAffx.3788.1.S1_at    | <b>0.46</b>  | LOC428404 | similar to voltage-gated sodium channel type IV alpha subunit                    |
| 408 | Gga.14519.1.S1_at       | <b>0.45</b>  |           | Finished cDNA, clone ChEST70o22                                                  |
| 409 | Gga.1678.3.S1_s_at      | <b>0.45</b>  | SCG5      | secretogranin V (7B2 protein)                                                    |
| 410 | Gga.5676.1.S1_at        | <b>0.44</b>  |           | Transcribed locus                                                                |
| 411 | Gga.13803.1.S1_s_at     | <b>0.44</b>  | CPA6      | carboxypeptidase A6                                                              |
| 412 | Gga.90.1.S1_at          | <b>0.43</b>  | MEOX2     | mesenchyme homeobox 2                                                            |
| 413 | GgaAffx.26097.1.S1_at   | <b>0.43</b>  | GPER      | G protein-coupled estrogen receptor 1                                            |
| 414 | Gga.2253.1.S1_at        | <b>0.42</b>  | TMEM163   | transmembrane protein 163                                                        |
| 415 | Gga.488.1.S1_at         | <b>0.39</b>  | ASCL1     | achaete-scute complex homolog 1 (Drosophila)                                     |
| 416 | Gga.19248.1.S1_at       | <b>0.38</b>  |           | Finished cDNA, clone ChEST668j21                                                 |
| 417 | GgaAffx.21351.1.S1_s_at | <b>0.37</b>  | CA4       | carbonic anhydrase IV                                                            |
| 418 | Gga.11572.1.S1_at       | <b>0.36</b>  | GPR22     | G protein-coupled receptor 22                                                    |
| 419 | GgaAffx.25296.1.S1_at   | <b>0.36</b>  | LOC776531 | similar to placenta growth factor                                                |
| 420 | Gga.2980.1.S1_at        | <b>0.36</b>  | IRX2      | iroquois homeobox 2                                                              |
| 421 | Gga.4536.2.S1_a_at      | <b>0.33</b>  | AKR1D1    | aldo-keto reductase family 1, member D1 (delta 4-3-ketosteroid-5-beta-reductase) |
| 422 | GgaAffx.20149.1.S1_s_at | <b>0.32</b>  |           | Finished cDNA, clone ChEST671g17                                                 |
| 423 | Gga.9667.1.S1_a_at      | <b>0.30</b>  | CHODL     | chondrolectin                                                                    |
| 424 | Gga.17528.1.S1_at       | <b>0.29</b>  | LOC776531 | Similar to placenta growth factor                                                |
| 425 | Gga.9667.1.S1_s_at      | <b>0.24</b>  | CHODL     | chondrolectin                                                                    |
| 426 | Gga.3551.1.S1_at        | <b>0.21</b>  | SPP1      | secreted phosphoprotein 1 (osteopontin, bone sialoprotein I)                     |
| 427 | Gga.398.1.S1_at         | <b>0.13</b>  | MMP-13    | matrix metalloproteinase-13 (collagenase-3)                                      |
| 428 | Gga.3468.1.S1_at        | <b>0.086</b> |           | Finished cDNA, clone ChEST275i11                                                 |
| 429 | Gga.13448.1.S1_at       | <b>0.076</b> | OSTN      | osteocrin                                                                        |
