# Supplementary material
Source: PubMed Central journal article supplement (PMC3137886)
Supplement: NIHMS300969-supplement-02.pdf [file NIHMS300969-supplement-02.pdf]

| <b>Gene symbol</b>    | <b>Accession no.</b> | <b>Forward primer</b>                                            | <b>Reverse primer</b>                                            |
|-----------------------|----------------------|------------------------------------------------------------------|------------------------------------------------------------------|
| <b>A2M</b>            | XM_416476            | TTC GCA GGA GGA GCT GTC ATT                                      | TCC ACT CTT GGC ATA GGT GGA                                      |
| <b>AKR1D1</b>         | XM_416341            | TGC AGG CAA CAC GAC ATT GT                                       | ATG CAA CCT GTG CAG CTG TCT                                      |
| <b>ALPHA 10 nAChR</b> | NM_001101036         | CAT GGA GAC CAA TGT GGT GCT                                      | GAT TCC CAT TGT AGG TCC AGG A                                    |
| <b>ASCL1</b>          | NM_204412            | CTT TTG TCG AGG CCT TGG ACT                                      | TCC CTC GGA ACA CGG TTT T                                        |
| <b>BDNF</b>           | NM_001031616         | ACC TGG ATG CTG CAA ACA TGT                                      | TGT TAC CCA CTC GCT TGT GCT                                      |
| <b>CALB2</b>          | NM_205316            | TAT GAT GAG GCC AAG CTG CAG                                      | AGG ACA GCT TCA TCC CCT GAA                                      |
| <b>CHODL</b>          | XM_001231434         | CTT GCC CTG ACC TCT ACC ATT G                                    | TGA TAA AGA TAC GGC CCT CCC                                      |
| <b>DACT2</b>          | FJ666340             | TCA GCG ATT TCA CAG CTA ACC G                                    | CCC AAT TGT CTG ACC GAT CCT                                      |
| <b>DNER</b>           | XM_422604            | TGC ATT GTG GCT TTA CGG TTG                                      | GAA AAA TGT TGC CTC ATC CGG                                      |
| <b>FGF3</b>           | NM_205327            | AAG TAC CAC CTG CAG ATC CAC C                                    | GAT CCC GAC ATC AAC AGC AGT                                      |
| <b>FGFBP1</b>         | XM_420773            | TTC TGA GAC TGG CAA ACA GCC                                      | CAC TTT TTG TCT TGC ACC ATG G                                    |
| <b>FGFRL1</b>         | NM_204456            | CCG CAG TGA TGT CAA ACC TGT                                      | ACA ACA AAC TTC TGT CCC CCG                                      |
| <b>FZD8</b>           | XM_418566            | CCC TCA CTG TTT GGT GCC ATT                                      | GCT GGC TCC TTG AAG TAC ATG C                                    |
| <b>GPR22</b>          | XM_001231968         | AAC ATC CGA ATC GGC ACA AG                                       | ACA CGG AAG TCC TTA CGC CAA                                      |
| <b>GREM2</b>          | CR524466             | TCA GAA GCT GGC ATT GCT ACA C                                    | TCA TTT TAC CCC ACA CCC ACA C                                    |
| <b>HES5</b>           | NM_001012695         | GCT ACC TGA AAT ACA GCC GAG C                                    | TTC TTT GAG GCA CCA GGC A                                        |
| <b>HEY1</b>           | XM_425926            | TTC TTC CAC CCA AAG GAG CAG                                      | ATC GAA CAC GCT GGA AGG CTA                                      |
| <b>IRX2</b>           | NM_001030336         | TGT CCA CAA GCA GAG CAG TGA C                                    | TGC ATT GCT GCG TGA TTG TAC                                      |
| <b>KCNJ2</b>          | NM_205370            | AGT AGG CTG CAT CAT TGA CGC                                      | ACG GCA TTG TGG CTG AAG A                                        |
| <b>LFNG</b>           | NM_204948            | ACC TGC CTG CTG GTG CTC ATG GTG GA                               | GCA GCT TCA CCA GCG TCC TCA CGT TCA                              |
| <b>LOC776531</b>      | XM_001236046         |                                                                  |                                                                  |
| <b>LRP11</b>          | XM_419668            |                                                                  |                                                                  |
| <b>MMP-13</b>         | AF070478             |                                                                  |                                                                  |
| <b>OSTN</b>           | NM_001098608         |                                                                  |                                                                  |
| <b>OTOF</b>           | XM_420015            | CCC CGG ATG TCA TGT TTG A                                        | GAA AGG ATG GCC CAT TTG TG                                       |
| <b>PTN</b>            | XM_416358            |                                                                  |                                                                  |
| <b>PTPRZ1</b>         | NM_001199312         | TGG CTA TGT GAT GCT CAT GGA                                      | AGG TTC TGA GCT GCA AAC TGC                                      |
| <b>RSPO2</b>          | XM_418383            | CTG GAA ACG AGA ACA AGG CAA                                      | AGT GCC TCA CGG CCA TTT T                                        |
| <b>RSPO3</b>          | XM_419752            |                                                                  |                                                                  |
| <b>SPP1</b>           | NM_204535            |                                                                  |                                                                  |
| <b>SPTBN5</b>         | XM_421149            |                                                                  |                                                                  |
| <b>TMC2</b>           | NM_001039324         |                                                                  |                                                                  |
| <b>TMCC2</b>          | XM_417961            |                                                                  |                                                                  |
| <b>ChEST905o6</b>     | CR524164             | TTC GAC TGG ACA CAG GCT GAT                                      | AAA CTG GAG CAA GCA CCA CAC                                      |
| <b>ChEST117a22</b>    | CR353620             |                                                                  |                                                                  |
| <b>ChEST275i11</b>    | CR389820             |                                                                  |                                                                  |
| <b>DTX2</b>           | XM_415763            | TAC CAC ATC AGC AGA GGC ATT CA<br>AGT GCC CCT CCT GTA AGA CCA TC | CCA GGT AGT TGG GGT CAG GGT AG<br>CCG TGA AAA TCA AGC GTC TGT TC |
